# Supplementary material for: Colorectal cancer subtype identification from differential gene expression levels using minimalist deep learning
Source: Springer Nature journal article supplement (doi:10.1186/s13040-022-00295-w), 2022-04-23
Supplement: 13040_2022_295_MOESM1_ESM.pdf [file 13040_2022_295_MOESM1_ESM.pdf]

**Table S1. Summary of CRC data sets**

| Dataset  | Platform              | Tissue       | Total | with CMS* | Source | Number of genes |
|----------|-----------------------|--------------|-------|-----------|--------|-----------------|
| GSE13067 | Affymetrix HG133plus2 | Fresh frozen | 74    | 67        | CRCSC  | 54675           |
| GSE13294 | Affymetrix HG133plus2 | Fresh frozen | 155   | 140       | CRCSC  | 54675           |
| GSE37892 | Affymetrix HG133plus2 | Fresh frozen | 130   | 118       | CRCSC  | 54675           |
| GSE39582 | Affymetrix HG133plus2 | Fresh frozen | 566   | 519       | CRCSC  | 54675           |
| GSE2109  | Affymetrix HG133plus2 | Fresh frozen | 293   | 266       | CRCSC  | 54675           |
| GSE14333 | Affymetrix HG133plus2 | Fresh frozen | 290   | 135       | CRCSC  | 54675           |
| GSE17536 | Affymetrix HG133plus2 | Fresh frozen | 177   | 38        | CRCSC  | 54675           |
| GSE20916 | Affymetrix HG133plus2 | Fresh frozen | 145   | 71        | CRCSC  | 54675           |

**Table S2. The performance of DeepCSD on TCGA**

|             | training set | test set |
|-------------|--------------|----------|
| ACCURACY    | 93.04        | 94.23    |
| precision   | 92.59        | 92.97    |
| specificity | 97.48        | 98.19    |
| sensitivity | 91.91        | 94.49    |

**Table S3. The detail of DeepCSD on TCGA test set**

|             | CMS1  | CMS2     | CMS3     | CMS4     |
|-------------|-------|----------|----------|----------|
| TP          | 7     | 19       | 7        | 16       |
| TN          | 44    | 31       | 43       | 35       |
| FN          | 1     | 2        | 0        | 0        |
| FP          | 0     | 0        | 2        | 1        |
| precision   | 1     | 1        | 0.777778 | 0.941176 |
| specificity | 1     | 1        | 0.955556 | 0.972222 |
| sensitivity | 0.875 | 0.904762 | 1        | 1        |

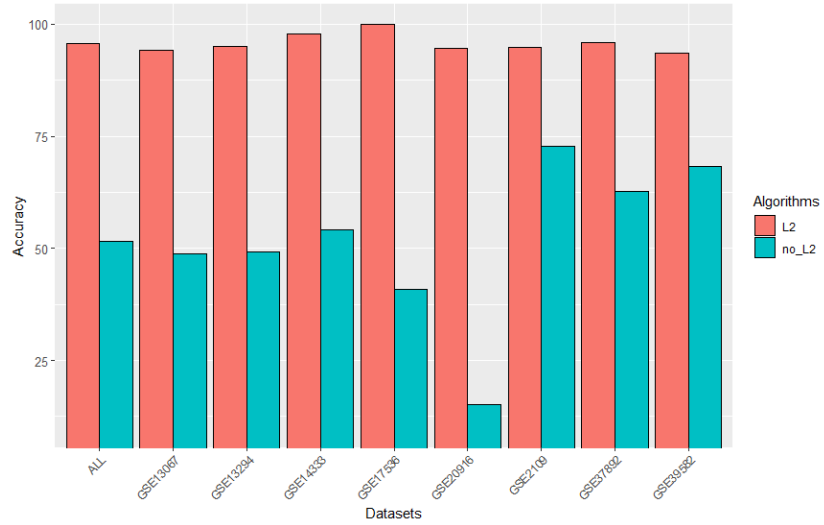

**Figure S1. Performance comparison of DeepCSD with and without  $L_2$  regularization.**

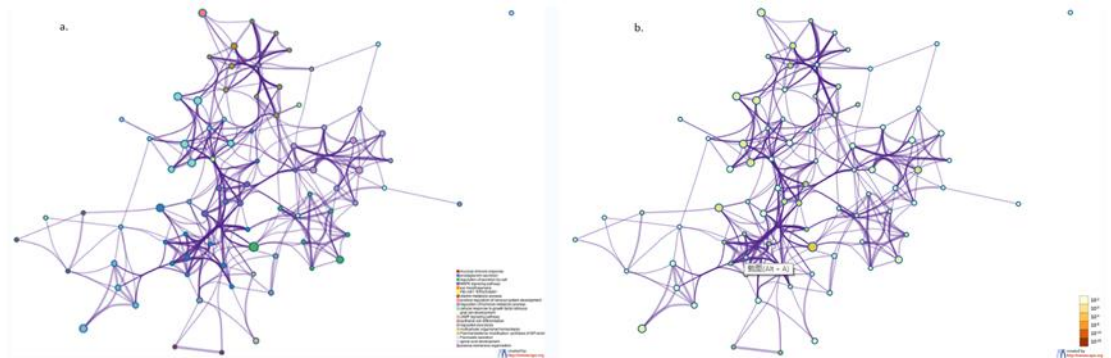

**Figure S2. Similarity network of enriched terms about the top 100 subtype-genes in 9-th neuron with similarity > 0.3. (Left) network of enrichment terms, colored by cluster ID, where nodes that with the same cluster ID are typically close to each other. (Right) network of enrichment terms, colored by p-value, where the terms with many genes tend to have a more significant p-value.**

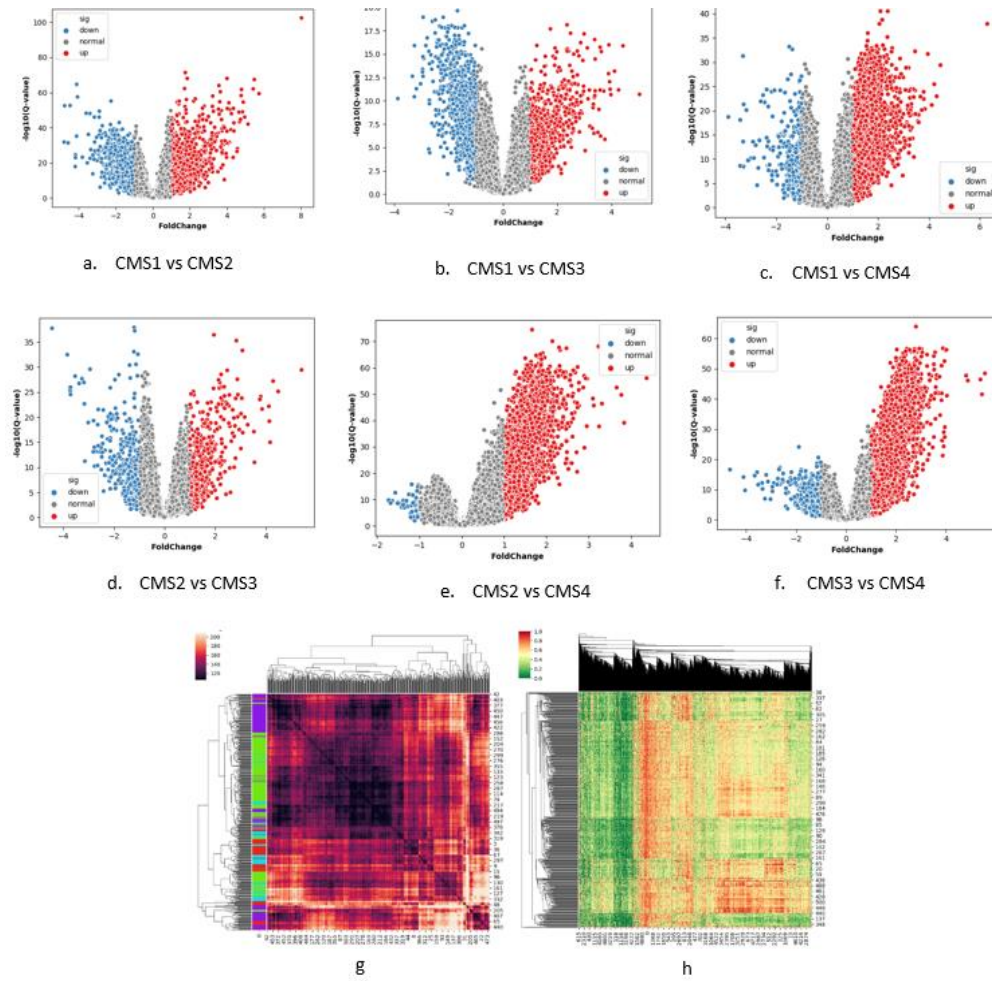

**Figure S3. TCGA gene expression analysis. (a)-(f) represents a comparison of each CMS group and each dot represents a gene: red represents up-regulated gene and blue represents down-regulated gene. (h) illustrates the difference between samples while (g) provides the genes' correlation to each sample.**

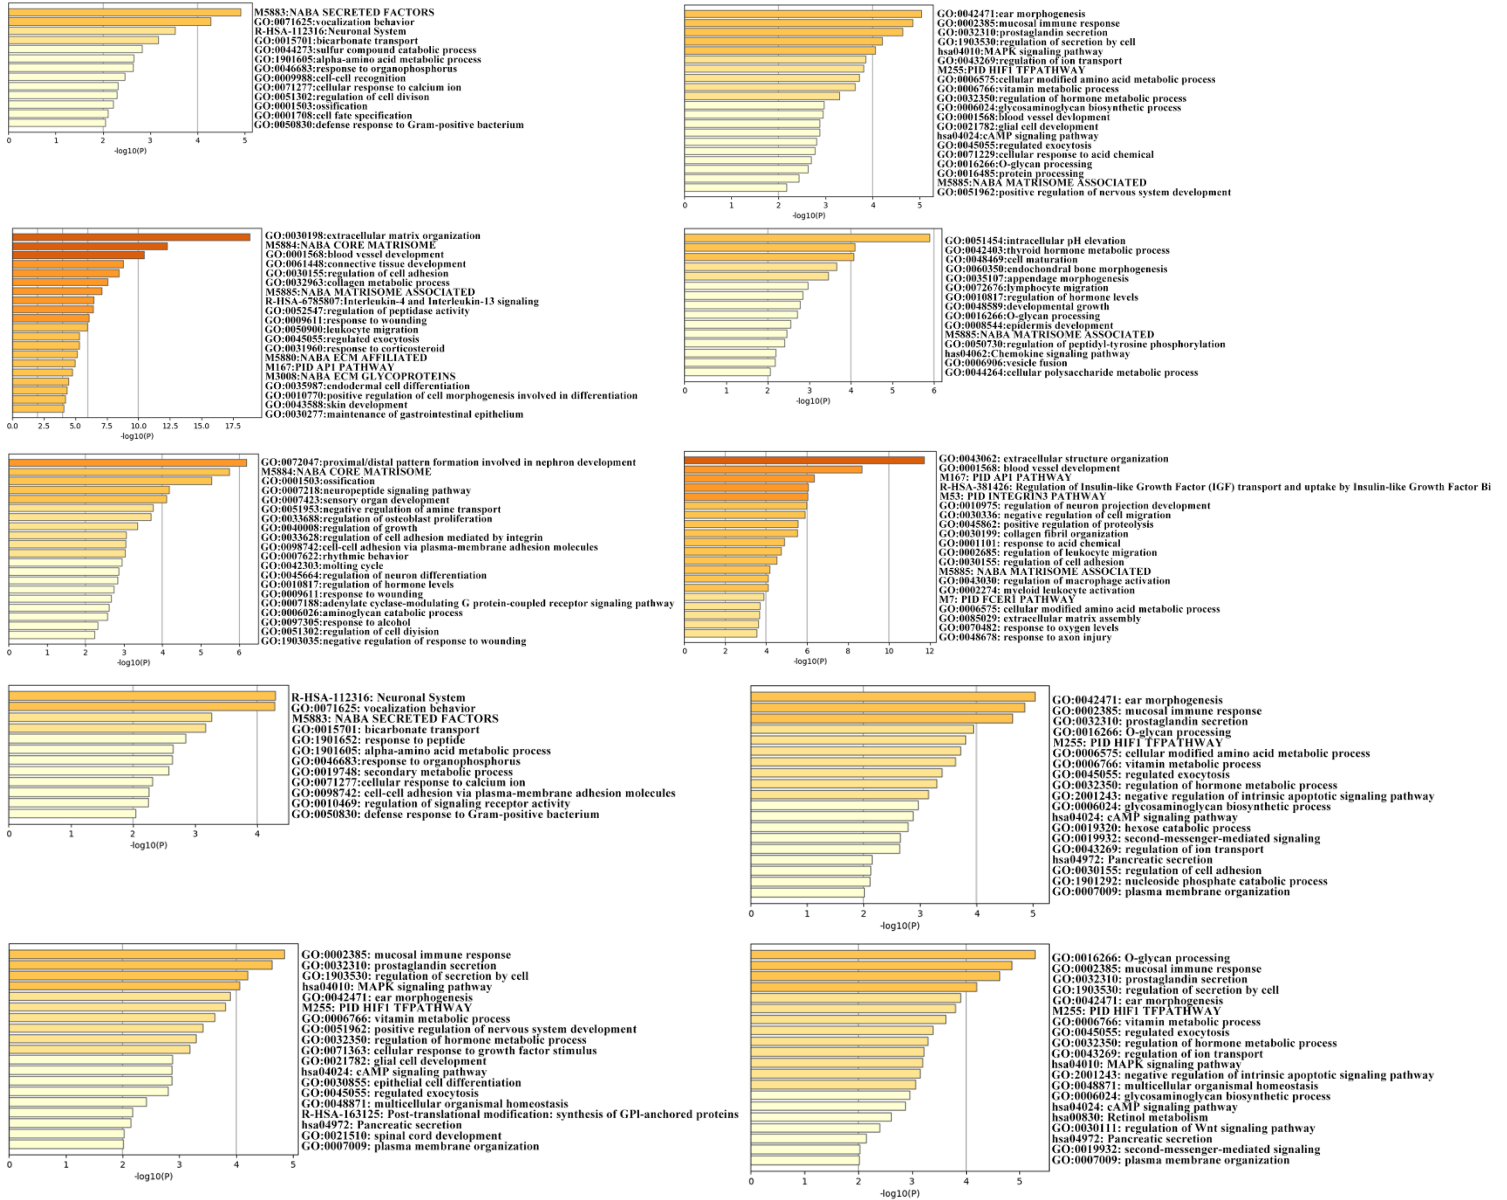

Figure S4. GO enrichment analysis of TCGA for the first ten neurons. Bar charts are plotted for the highly enriched GO terms across input gene lists as sorted and colored by p-values.
